# Supplementary material for: Experiences of participants of a volunteer-supported walking intervention to improve physical function of nursing home residents – a mixed methods sub-study of the POWER-project
Source: Springer Nature journal article supplement (doi:10.1186/s12877-023-04044-4), 2023-06-01
Supplement: MOESM1 [file 25434628]

## S1 Appendix Interview Guide

| Topics                                                 | Questions                                                                                                                                                                                                                       |
|--------------------------------------------------------|---------------------------------------------------------------------------------------------------------------------------------------------------------------------------------------------------------------------------------|
| General                                                | Standard opening question:<br>What was the reason you agreed to participate in the POWER project?<br>How did you find out about the project?                                                                                    |
| Expectations prior to the project                      | What expectations did you have prior to the POWER project?                                                                                                                                                                      |
| Experiences with training, study materials and support | Can you tell me how you experienced the preparation meetings prior to the project and the exchange meetings during the project?                                                                                                 |
| Relationship to the senior (test person)               | Can you tell me about the first meeting with „your“ senior?<br>What relationship developed between you during the course of the project (relationship of trust)?<br>What did you talk about during the walks?                   |
| Impact of walks to the senior(intervention)            | Can you tell me about the impact of the walks on the senior? Have you noticed developments?<br>Do you think positive changes in the wellbeing of the elderly could be for reasons other than walks?                             |
| Impact of walks to the volunteer                       | How did you experience the walks with the senior?<br>Can you tell me about situations in which you felt unsuccessful, insecure or overwhelmed?<br>How did the regular walks affect you?                                         |
| Satisfaction with the intervention                     | Can you tell me how satisfied you are with your voluntary work in the POWER project?<br>Would you like to change something?                                                                                                     |
| Future of voluntary work in the POWER project          | Would you like to continue the walks with “your“ senior?<br>How will the relationship between you and the senior develop after stopping the walks?<br>Will you keep in touch even if “your” senior can no longer go for a walk? |
