# Supplementary material for: Experiences of participants of a volunteer-supported walking intervention to improve physical function of nursing home residents – a mixed methods sub-study of the POWER-project
Source: Springer Nature journal article supplement (doi:10.1186/s12877-023-04044-4), 2023-06-01
Supplement: MOESM2 [file 25434628]

## S2 APPENDIX Coding scheme individual interviews/focus groups

| <b>Main category</b>                        | <b>Sub category individual interview</b>                                                                                                           | <b>Sub category focus group</b>                                                                                                                               |
|---------------------------------------------|----------------------------------------------------------------------------------------------------------------------------------------------------|---------------------------------------------------------------------------------------------------------------------------------------------------------------|
| Reason for participation                    | reason for participation                                                                                                                           | reason for participation                                                                                                                                      |
| Physical and mental effects of intervention | effects on NHRs' physical well-being<br>effects on NHRs' mental well-being                                                                         | effects on NHRs physical well-being<br>effects on NHRs' mental well-being<br>effects on Vs' physical well-being<br>effects on Vs' mental well-being           |
| additional experiences of intervention      | relationship of walking partners<br>behavior of V<br>alternative exercise program according to protocol<br>protection/safety for NHR on walks by V | relationship of walking partners<br>behavior of NHR<br>alternative exercise program according to protocol<br>protection/safety for NHR on walks by V          |
| Challenges of intervention                  | uncertainty/overload<br>discontinuation of interverntion<br>challenges due to general conditions                                                   | uncertainty/overload<br>responsibility for NHR<br>challenges due to NHRs behaviour<br>challenges due to general conditions<br>discontinuation of intervention |
| Future/continuation                         | continuation of contacts planned/not planned                                                                                                       | continuation of contacts planned/not planned                                                                                                                  |
| Project organization                        | matching NHR-V<br>selection of NHR and V/recommendations                                                                                           | matching NHR-V<br>selection of NHR/recommendations                                                                                                            |

*NHR= participating nursing home residents, V=volunteer,*
