# Supplementary material for: Experiences of participants of a volunteer-supported walking intervention to improve physical function of nursing home residents – a mixed methods sub-study of the POWER-project
Source: Springer Nature journal article supplement (doi:10.1186/s12877-023-04044-4), 2023-06-01
Supplement: MOESM3 [file 25434628]

**Additional file 1. Motivation for project participation and sustainable implementation**

NHR=nursing home resident, V=Volunteer, 1=individual interview, 2=focus group, \*multiple response possible, †=data given for 54 NHR

|                                             | Qualitative study                                                                                                                                                                                                                                                                                                                                                                    |                                                                                                                                                                                                                                                                                                                                                                                                                                        | Quantitative Study                                                                                                                             |                                                                                                                                                                                                                                                                                                                                                                                                                                                                                                                                                     |
|---------------------------------------------|--------------------------------------------------------------------------------------------------------------------------------------------------------------------------------------------------------------------------------------------------------------------------------------------------------------------------------------------------------------------------------------|----------------------------------------------------------------------------------------------------------------------------------------------------------------------------------------------------------------------------------------------------------------------------------------------------------------------------------------------------------------------------------------------------------------------------------------|------------------------------------------------------------------------------------------------------------------------------------------------|-----------------------------------------------------------------------------------------------------------------------------------------------------------------------------------------------------------------------------------------------------------------------------------------------------------------------------------------------------------------------------------------------------------------------------------------------------------------------------------------------------------------------------------------------------|
|                                             | Key results                                                                                                                                                                                                                                                                                                                                                                          | Example                                                                                                                                                                                                                                                                                                                                                                                                                                | Variables assessed in the questionnaire                                                                                                        | Response category N (%)                                                                                                                                                                                                                                                                                                                                                                                                                                                                                                                             |
| <b>Motivation for project participation</b> | <p><u>Consensus:</u><br/>+ Interest in exercise</p> <p><u>NHR:</u><br/>+Improvement of physical fitness and gait pattern<br/>+ Opportunity to "get out"<br/>- Pressure due to fixed appointment</p> <p><u>V:</u><br/>+ Doing good/meaningful things (personal fulfillment)<br/>+ Interest in the topic</p>                                                                           | <p>"Well, how can I say it? I always wanted to learn to walk again. I almost couldn't walk at all anymore." (NHR-W4)</p> <p>"I thought I would come as a completely new person and give a completely different input for people. That was one thing, the other was: I like to move and I thought it would be good for others too. So that's a win-win story, I thought." (V-F1B5)</p>                                                  | Motives for participating in the project*                                                                                                      | <p>Interest in physical activity 21 (52.5)</p> <p>Gaining experience 20 (50.0)</p> <p>Interest in scientific study 17 (42.5)</p> <p>Meaning of life 16 (40.0)</p> <p>New contacts 14 (35.0)</p> <p>Improving one's own health 2 (5.0)</p> <p>Receiving recognition 2 (5.0)</p> <p>Financial Reward 1 (2.5)</p> <p>others 8 (20.0)</p> <p>Don't know 0 (0)</p> <p>Not stated 0 (0)</p> <p>Missing 0 (0)</p>                                                                                                                                          |
|                                             | <p><u>Consensus:</u><br/>+ Keep in contact<br/>+ Contact/walks rarely regular</p> <p><u>NHR:</u><br/>+ Focus on social contacts/conversation<br/>- Discontinuation of contact/walks for no apparent reason for NHR</p> <p><u>V:</u><br/>- decreasing motivation of NHR for physical activity<br/>- Physical activity could often not be continued due to health problems of NHRs</p> | <p>"We sit outside on the bench and then talk. But outside." (NHR-W2)</p> <p>"I said get in touch. However, no one came forward." (NHR-W5)</p> <p>"We have agreed that we will continue to run together. Twice a week." (V-F2B3)</p> <p>"Yes, in my case it simply ended due to illness. She was a lady with Parkinson's disease and afterwards she was no longer allowed to walk like that and sometimes even lay down." (V-F1B5)</p> | <p>Contact with V at the beginning of the lockdown*</p> <p>Contact during the lockdown*</p> <p>Planned restart of walks after the lockdown</p> | <p>Visits 10 (32.3)</p> <p>Walks 7 (22.6)</p> <p>Other 6 (19.4)</p> <p>No 15 (48.4)</p> <p>Missing 9 (22.5)</p> <p>Telephone calls 7 (36.8)</p> <p>Correspondence (letter/Whatsapp/SMS) 3 (15.8)</p> <p>Other (shopping for PRO, talking over the balcony) 3 (15.8)</p> <p>Walks/visits (with special permission) 2 (10.5)</p> <p>No 7 (36.8)</p> <p>Missing 0 (0)</p> <p>Yes 11 (47.8)</p> <p>More-likely yes 4 (17.4)</p> <p>No 2 (8.7)</p> <p>More likely no 0 (0)</p> <p>Don't know 2 (8.7)</p> <p>Not stated 0 (0)</p> <p>Missing 4 (17.4)</p> |
