# Supplementary material for: Experiences of participants of a volunteer-supported walking intervention to improve physical function of nursing home residents – a mixed methods sub-study of the POWER-project
Source: Springer Nature journal article supplement (doi:10.1186/s12877-023-04044-4), 2023-06-01
Supplement: MOESM4 [file 25434628]

**Additional file 2. Physical and mental effects on nursing home residents (NHR) and volunteers (V) due to intervention**

NHR=nursing home resident, V=Volunteer, 1=individual interview, 2=focus group

| Qualitative study                                                                                                                                                                                                                                                                                                                                                                                                                                                                                                                                                                               |                                                                                                                                                                                                                                                                                                                                                                                                                                                                                                                                                      | Quantitative Study                                                                                                                       |                                                                                                                                                                                                                                                                                                                                                                                                                                                                                                                                                     |
|-------------------------------------------------------------------------------------------------------------------------------------------------------------------------------------------------------------------------------------------------------------------------------------------------------------------------------------------------------------------------------------------------------------------------------------------------------------------------------------------------------------------------------------------------------------------------------------------------|------------------------------------------------------------------------------------------------------------------------------------------------------------------------------------------------------------------------------------------------------------------------------------------------------------------------------------------------------------------------------------------------------------------------------------------------------------------------------------------------------------------------------------------------------|------------------------------------------------------------------------------------------------------------------------------------------|-----------------------------------------------------------------------------------------------------------------------------------------------------------------------------------------------------------------------------------------------------------------------------------------------------------------------------------------------------------------------------------------------------------------------------------------------------------------------------------------------------------------------------------------------------|
| Key results                                                                                                                                                                                                                                                                                                                                                                                                                                                                                                                                                                                     | Example                                                                                                                                                                                                                                                                                                                                                                                                                                                                                                                                              | Variables assessed in the questionnaire                                                                                                  | Response category                                                                                                                                                                                                                                                                                                                                                                                                                                                                                                                                   |
| <p><b>Effects on NHRs' physical well-being<sub>1,2</sub></b></p> <p><u>Consensus:</u><br/>                     + partial permanent increase in performance<br/>                     + partial decrease in physical complaints<br/>                     - partial increase in physical complaints (due to existing underlying diseases/age of PRO).<br/> <u>NHR:</u><br/>                     + increasing independence<br/>                     - partial relief about the end of the walks (observation period)<br/> <u>V:</u><br/>                     - partial discontinuation of walks</p> | <p>"...sometimes it is progress when there is no step backwards" (V-F2B4)</p> <p>"Imagine all the things you couldn't do in the last few months. You've learned all that now. And that's how I see it too. That I can move around quite freely now and only through this walks back and forth" (NHR-W10)</p> <p>Yeah, that just got me out. Because I / I wasn't even in the garden yet. And then I also went around the square once with Ms XX and I saw completely strange streets or things / so I also crossed the street sometimes.(NHR-W1)</p> | <p>Frequency of walks/week</p>                                                                                                           | <p>&lt;1x/week 8 (14.8)<br/>                     1x/week 19 (35.2)<br/>                     2x/week 24 (44.4)<br/>                     3x/week 2 (3.7)<br/>                     &gt;3x/week 1 (1.9)</p>                                                                                                                                                                                                                                                                                                                                             |
| <p><b>Effect on NHRs' mental well-being<sub>1,2</sub></b></p> <p><u>Consensus:</u><br/>                     + Participants became more open in the course of time<br/>                     + Social exchange/conversations important and positive<br/> <u>NHR:</u><br/>                     + new courage to face life, distraction from gloomy thoughts<br/>                     - Fear of excessive demands and obligations<br/>                     - unreliability and private problems of the volunteers</p>                                                                               | <p>"We laugh a lot. Moreover, it gives me other ideas. Not always just sad ones. When you're in a situation like that, you're always in the mood to complain." (NHR-W4)</p> <p>"Then we sat there for half an hour doing fractions. He wanted to try shorthand again. Then I asked again, I used to be able to do it, and I tried to be a bit more firm again." (V-F2B2)</p>                                                                                                                                                                         | <p>n/a</p>                                                                                                                               | <p>n/a</p>                                                                                                                                                                                                                                                                                                                                                                                                                                                                                                                                          |
| <p><b>Impact on Vs' physical well-being<sub>2</sub></b></p> <p><u>V:</u><br/>                     + walks as relaxing<br/>                     + increased sporting activity by cycling or Nordic walking afterwards</p>                                                                                                                                                                                                                                                                                                                                                                        | <p>"...because the way with the bike is already good for me then. The rest is good for both of us" (V-F2B3)</p>                                                                                                                                                                                                                                                                                                                                                                                                                                      | <p>Self-perceived improvement in V's physical performance and health</p> <p>V's self-perceived physical overload due to intervention</p> | <p>Improved 3 (7.5)<br/>                     More likely improved 5 (12.5)<br/>                     No difference 32 (80.0)<br/>                     More likely impaired 0 (0)<br/>                     Impaired 0 (0)<br/>                     Missing 0 (0)</p> <p>Overloaded 0 (0)<br/>                     More likely overloaded 1 (2.5)<br/>                     Neither nor 0 (0)<br/>                     More likely not overloaded 4 (10.0)<br/>                     Not overloaded 35 (87.5)<br/>                     Missing 0 (0)</p> |

**Additional file 2. Physical and mental effects on nursing home residents (NHR) and volunteers (V) due to intervention**

*NHR=nursing home resident, V=Volunteer, 1=individual interview, 2=focus group*

|                                                    |                                                                                                                                                                                                                                                                                           | Qualitative study                                                                                                                                                                                                                                                                                                                                                                                                                                                                                                                                                                                                 |                                                                      | Quantitative Study                                                                                                                                                   |  |
|----------------------------------------------------|-------------------------------------------------------------------------------------------------------------------------------------------------------------------------------------------------------------------------------------------------------------------------------------------|-------------------------------------------------------------------------------------------------------------------------------------------------------------------------------------------------------------------------------------------------------------------------------------------------------------------------------------------------------------------------------------------------------------------------------------------------------------------------------------------------------------------------------------------------------------------------------------------------------------------|----------------------------------------------------------------------|----------------------------------------------------------------------------------------------------------------------------------------------------------------------|--|
|                                                    | Key results                                                                                                                                                                                                                                                                               | Example                                                                                                                                                                                                                                                                                                                                                                                                                                                                                                                                                                                                           | Variables assessed in the questionnaire                              | Response category                                                                                                                                                    |  |
| <b>Impact on Vs' mental well-being<sub>2</sub></b> | <p><u>V</u>:</p> <ul style="list-style-type: none"> <li>+ Insight into life in the elderly</li> <li>+ Joy and gratitude of the NHR</li> <li>+ a meaningful task</li> <li>+ intergenerational instructive exchange</li> <li>- partly poor living conditions in the nursing home</li> </ul> | <p>“The arrival, a little bit of walking, a little bit of chatting, for the lady it was positive, for me it was positive....” (V-F1B5)</p> <p>“Then I always think to myself, I'm still a young person and I should actually change that now. [the poor living conditions in the nursing home] I have to take responsibility now, so that when I'm that age, the change is there. That I don't have the same problem later on.”(V-F2B5)</p> <p>“Every time I go out there (...) so that's bad. And many of them just don't leave it any more, not at all. And this realization sometimes gets to me.”(V-F2B2)</p> | <p>Vs' self-perceived psychological overload due to intervention</p> | <p>Overloaded 0 (0)</p> <p>More likely overloaded 1 (2.5)</p> <p>Neither nor 1 (2.5)</p> <p>More likely not overloaded 11 (27.5)</p> <p>Not overloaded 27 (67.5)</p> |  |
