# Supplementary material for: Experiences of participants of a volunteer-supported walking intervention to improve physical function of nursing home residents – a mixed methods sub-study of the POWER-project
Source: Springer Nature journal article supplement (doi:10.1186/s12877-023-04044-4), 2023-06-01
Supplement: MOESM6 [file 25434628]

**Additional file 6. Awareness of project, training & support**

*NHR=nursing home resident, V=Volunteer, 1=individual interview, 2=focus group, \*multiple response possible, †=data given for 54 NHR*

| Qualitative study                                   |             | Quantitative Study |                                                                                                                                                                                                                                        |
|-----------------------------------------------------|-------------|--------------------|----------------------------------------------------------------------------------------------------------------------------------------------------------------------------------------------------------------------------------------|
|                                                     | Key results | Example            | Response category n (%)                                                                                                                                                                                                                |
| <b>Project attention</b>                            | n/a         | n/a                | <b>Project attention*</b><br>Press/Radio 22 (55.0)<br>Friends 8 (20.0)<br>Flyer 7 (17.5)<br>Volunteer agency 2 (5.0)<br>Nursing home 1 (2.5)<br>Other 4 (10.0)<br>Don't know 0 (0)<br>Not stated 0 (0)<br>Missing 0 (0)                |
| <b>Experience with elderly before project start</b> | n/a         | n/a                | <b>Experience with elderly before project start*</b><br>Care in private sector 19 (47.5)<br>Professional experience 8 (20.0)<br>Voluntary activities 8 (20.0)<br>No 12 (30.0)<br>Don't know 0 (0)<br>Not stated 0 (0)<br>Missing 0 (0) |
| <b>Important topics included in training</b>        | n/a         | n/a                | <b>Important topics included in training</b><br>Yes 33 (82.5)<br>More likely yes 6 (15.0)<br>More likely no 0 (0)<br>No 0 (0)<br>Don't know 1 (2.5)<br>Not stated 0 (0)<br>Missing 0 (0)                                               |
| <b>Helpfulness of training material</b>             | n/a         | n/a                | <b>Helpfulness of training material</b><br>Yes 23 (57.5)<br>More likely yes 10 (25.0)<br>More likely no 7 (17.5)<br>No 0 (0)<br>Don't know 0 (0)<br>Not stated 0 (0)<br>Missing 0 (0)                                                  |
| <b>Participation in experience change meeting</b>   | n/a         | n/a                | <b>Participation in experience change meeting</b><br>Yes 31 (77.5)<br>No 8 (20)<br>Not stated 0 (0)<br>Missing 1 (2.5)                                                                                                                 |
