# Supplementary material for: Experiences of participants of a volunteer-supported walking intervention to improve physical function of nursing home residents – a mixed methods sub-study of the POWER-project
Source: Springer Nature journal article supplement (doi:10.1186/s12877-023-04044-4), 2023-06-01
Supplement: MOESM8 [file 25434628]

**Additional file 4. Challenges of intervention for NHR and V**

NHR=nursing home resident, V=Volunteer, 1=individual interview, 2=focus group, \*multiple response possible, †=data given for 54 NHR

| Qualitative study                                        |                                                                                                                                                                       | Quantitative Study                                                                                                                                                                                                                                                                                                                                                                                                                                                                                                                                        |                                                                                                                                               |                                                                                                                                                                                                                                                                                                                                                                                    |
|----------------------------------------------------------|-----------------------------------------------------------------------------------------------------------------------------------------------------------------------|-----------------------------------------------------------------------------------------------------------------------------------------------------------------------------------------------------------------------------------------------------------------------------------------------------------------------------------------------------------------------------------------------------------------------------------------------------------------------------------------------------------------------------------------------------------|-----------------------------------------------------------------------------------------------------------------------------------------------|------------------------------------------------------------------------------------------------------------------------------------------------------------------------------------------------------------------------------------------------------------------------------------------------------------------------------------------------------------------------------------|
|                                                          | Key results                                                                                                                                                           | Example                                                                                                                                                                                                                                                                                                                                                                                                                                                                                                                                                   | Variables assessed in the questionnaire                                                                                                       | Response category N (%)                                                                                                                                                                                                                                                                                                                                                            |
| <b>Responsibility for NHR's<sub>2</sub></b>              | + Safety due to proximity to the nursing home/contact person                                                                                                          | "...we actually had a very great safety, the nursing home was close by, if anything happened, that made the whole work very easy for us" (V-F1B5).                                                                                                                                                                                                                                                                                                                                                                                                        | Support from nursing home/contact person <sup>†</sup>                                                                                         | Yes 32 (59.3)<br>No 21 (38.9)<br>Don't know 0 (0)<br>Not stated 0 (0)<br>Missing 1 (1.9)                                                                                                                                                                                                                                                                                           |
| <b>Challenges due to the NHR's behaviour<sub>2</sub></b> | - Changing motivation to walks and exercise<br>- Existing physical and cognitive diseases and limitations<br>- In some cases, significant persuasion work is required | "He was also very forgetful, so much that when I asked him where we were, where we had been before and so on, he couldn't remember at all." (V-F1B1)<br><br>"Because she often doesn't want to. You can't force her. I try to motivate her. But that doesn't always work. She has days when she goes, but then again she doesn't" (V-F2B1).                                                                                                                                                                                                               | Cancelled appointments by NHR* <sup>†</sup>                                                                                                   | Health conditions NHR 24 (44.4)<br>Motivation NHR 14 (25.9)<br>Weather 8 (14.8)<br>Other 8 (14.8)<br>Don't know 0 (0)<br>No 14 (25.9)<br>Not stated 0 (0)<br>Missing 0 (0)                                                                                                                                                                                                         |
| <b>Uncertainty/overload<sub>1,2</sub></b>                | <u>NHR:</u><br>- Physical overload due to walks<br><u>V:</u><br>- Adverse events unsettled V<br>+ no interruption/discontinuation of walks due to Adverse events      | "When it was over, I was happy. Then I was so exhausted that the first thing I did was sit down on the bed or the armchair." (NHR-W5)<br><br>"I was (...) was pretty much at the beginning, still a stranger, not doing anything big (...) and she can't go any further. Oh, I ran to bring the wheelchair down. When she was sitting in it, I was happy. I brought her up, water, water, water, and then I went to the nursing staff and told them, but as I said: in retrospect it was nothing bad, but in the situation: no, it wasn't great."(V-F1B2) | V's self-perceived physical overload due to intervention<br><br><br><br><br><br>Vs' self-perceived psychological overload due to intervention | More likely Overloaded 0 (0)<br>More likely overloaded 1 (2.5)<br>More likely not overloaded 4(10.0)<br>Not overloaded 35 (87.5)<br>Don't know 0 (0)<br>Not stated 0 (0)<br>Missing 0 (0)<br><br>Overloaded 0 (0)<br>More likely overloaded 1 (2.5)<br>More likely not overloaded 11 (27.5)<br>Not overloaded 27 (67.5)<br>Don't know 1 (2.5)<br>Not stated 0 (0)<br>Missing 0 (0) |

**Additional file 4. Challenges of intervention for NHR and V**

NHR=nursing home resident, V=Volunteer, 1=individual interview, 2=focus group, \*multiple response possible, †=data given for 54 NHR

| Qualitative study                                           |                                                                                                                                                                   | Quantitative Study                                                                                                                                                                                                                                                                                                                                                                                                                                                                           |                                                                             |                                                                                                                                                                                                                                                      |
|-------------------------------------------------------------|-------------------------------------------------------------------------------------------------------------------------------------------------------------------|----------------------------------------------------------------------------------------------------------------------------------------------------------------------------------------------------------------------------------------------------------------------------------------------------------------------------------------------------------------------------------------------------------------------------------------------------------------------------------------------|-----------------------------------------------------------------------------|------------------------------------------------------------------------------------------------------------------------------------------------------------------------------------------------------------------------------------------------------|
|                                                             | Key results                                                                                                                                                       | Example                                                                                                                                                                                                                                                                                                                                                                                                                                                                                      | Variables assessed in the questionnaire                                     | Response category N (%)                                                                                                                                                                                                                              |
| <b>Discontinuation of intervention by NHR<sub>1,2</sub></b> | <p><u>V:</u><br/>- Lack of information about project/intervention led to discontinuations</p>                                                                     | <p>"I was glad when that was over. Because then I was no longer able to cope so well. Therefore, I was glad when it was over. Yes, I was then also sick and then somehow it was bad once. Now I am lying down again. That time is also over and it's also quite good that it's over now."(NHR-W7)</p> <p>"The second lady didn't really know herself what she was getting into, I think. And after a short time she said, "no, I don't need to take part in any more Olympics"."(V-F1B2)</p> | Discontinuation of intervention by NHR (observational or extended period)*† | <p>Health conditions 2 (3.7)</p> <p>Lack of motivation 10 (18.5)</p> <p>Lack of time 0 (0)</p> <p>Other( e.g. end of observational period) 16 (29,6)</p> <p>No 21 (38.9)</p> <p>Don't know 1 (1.9)</p> <p>Not stated 4 (7.4)</p> <p>Missing 0(0)</p> |
| <b>Challenges due to general conditions<sub>1,2</sub></b>   | <p><u>Consensus:</u><br/>- Surroundings of nursing home inappropriate for walks.<br/>- Weather conditions</p> <p><u>NHR:</u><br/>- fixed appointment stressed</p> | <p>"...because this home, so it's just it's steep uphill and downhill..."(V-F1B1)</p> <p>"As I said, that it's so bumpy here. Yes, the pavement, the stones are also broken and when you're with the walker, it's all a bit bumpy." (NHR-W3)</p> <p>"Yes, there was a certain time, now you have to be ready. You have to be ready now. Do you have to go to the toilet first or not? I can't do that well anymore. That's all that doesn't work anymore." (NHR-W1)</p>                      | Surroundings suitable for walks*                                            | <p>Yes 33 (61.1)</p> <p>No 19 (35.2)</p> <p>Don't know 0 (0)</p> <p>Not stated 1 (1.9)</p> <p>Missing 1 (1.9)</p>                                                                                                                                    |
